# Beyond Fitness Decoupling: Tradeoff-breaking during Evolutionary Transitions in Individuality

Pierrick Bourrat<sup>1,2\*</sup>, Guilhem Doulcier<sup>2,3\*</sup>, Caroline J. Rose<sup>4</sup>, Paul B. Rainey<sup>3,5</sup>, Katrin Hammerschmidt<sup>6</sup>

<sup>1</sup>Philosophy Department, Macquarie University, New South Wales 2109, Australia.

<sup>2</sup>Department of Philosophy & Charles Perkins Centre, The University of Sydney, New South Wales 2006, Australia.

<sup>3</sup>Laboratory of Biophysics and Evolution, Chemistry, Biology and Innovation (CBI) UMR8231, ESPCI Paris, CNRS, PSL Research University, 10 rue Vauquelin, Paris, France.

<sup>4</sup>Centre d'Écologie Fonctionnelle et Évolutive (CEFE), CNRS, Montpellier, France.

<sup>5</sup>Max Planck Institute for Evolutionary Biology, Plön, Germany.

<sup>6</sup>Institute of Microbiology, Kiel University, Kiel, Germany.

\*These authors contributed equally to this work.

Author ORCIDs

Pierrick Bourrat <https://orcid.org/0000-0002-4465-6015>

Guilhem Doulcier <https://orcid.org/0000-0003-3720-9089>

Caroline J Rose <https://orcid.org/0000-0001-7133-0355>

Paul B Rainey <https://orcid.org/0000-0003-0879-5795>

Katrin Hammerschmidt <https://orcid.org/0000-0003-0172-8995>

Correspondence should be addressed to PB [p.bourrat@gmail.com](mailto:p.bourrat@gmail.com), GD [guihem.doulcier@normalesup.org](mailto:guihem.doulcier@normalesup.org), and KH [katrinhammerschmidt@googlemail.com](mailto:katrinhammerschmidt@googlemail.com).

## ***Abstract***

*Evolutionary transitions in individuality (ETIs) involve the formation of Darwinian collectives from Darwinian particles. The transition from cells to multicellular life is a prime example. During an ETI, collectives become units of selection in their own right. However, the underlying processes are poorly understood. One observation used to identify the completion of an ETI is an increase in collective-level performance accompanied by a decrease in particle-level performance, for example, measured by growth rate. This seemingly counterintuitive dynamic has been referred to as “fitness decoupling” and has been used to interpret both models and experimental data. Using a mathematical approach we show this concept to be problematic in that the fitness of particles and collectives can never decouple: calculations of particle and collective fitness performed over appropriate and equivalent time intervals are necessarily the same. By way of solution, we draw attention to the value of mechanistic approaches that emphasise traits as opposed to fitness and tradeoffs among traits. This trait-based approach is sufficient to capture dynamics that underpin evolutionary transitions. In addition, drawing upon both experimental and theoretical studies, we show that while early stages of transitions might often involve tradeoffs among particle traits, later—and critical—stages are likely to involve rupture of such tradeoffs. Tradeoff-breaking thus stands as a useful marker for ETIs.*

**Keywords:** Evolutionary transitions in individuality; Tradeoff; Evolutionary constraints; Fitness landscapes; Transfer of fitness; Export of fitness; Major transitions, Multicellularity; Life-history traits; Lande’s equation; Lifecycle; Matrix population models; Division of Labour; Ecological scaffolding; Mutation ratchet.

## Introduction

Evolutionary transitions in individuality (ETIs) are events of major significance in the history of life. They begin with lower-level entities (particles) and complete when higher-level entities (collectives) acquire properties sufficient to participate directly in the process of evolution by natural selection (see Glossary for definitions of technical terms). ETIs of particular note include the evolution of chromosomes (from genes), the eukaryotic cell (from an ancestral eubacterium and archaeobacterium) and multicellularity (from single cells) (Bouchard & Huneman, 2013; Bourke, 2011; Buss, 1987; Calcott & Sterelny, 2011; Jablonka, 1994; Maynard Smith & Szathmary, 1995; Michod, 1999; van Gestel & Tarnita, 2017; West et al., 2015). Here we focus attention on the transition from cells to multicellular life.

Evolutionary dynamics underpinning the transition to multicellularity have proven difficult to capture, but influential for theory — and guiding experimental analysis — has been the concept of “fitness decoupling”, which posits that the fitness of a collective in the early stage of a transition is directly proportional to the fitness of its particles and that as the evolutionary transition proceeds, collective fitness “becomes decoupled from the fitness of its lower-level components” (Michod et al., 2003, p. 96). This notion is based on the fact that the evolution of cooperation, division of labour or conflict-mediating mechanisms seem to improve collective-level fitness at the cost of particle fitness. This phenomenon has been interpreted under the lens of the export-of-fitness framework, in which the evolution of such mechanisms mark “transfer of fitness” from particle to collective levels (Michod et al., 2003; Michod, 2005; Okasha, 2006, 2009; Folse & Roughgarden, 2010).

While this theoretical model seems to be intuitive, and empirical tests straightforward, we demonstrate here that this is not the case: it is not only that the notion of fitness and its use in evolutionary thinking is generally problematic (as pointed out, among others, by Doebeli et al., 2017) but also that measurement of fitness in experiments – in particular in the context of ETIs, where fitness is usually compared between two organisational levels – is difficult. Experimental investigations of early stages in the transition to multicellularity (Hammerschmidt et al., 2014; Rose et al., 2020) are a good example. Data from these experiments showed collective-level fitness to have improved while cell-level fitness declined over evolutionary time, thus giving the impression that the fitness of cells had decoupled from the fitness of collectives (see below for details). While several proxies for fitness were obtained, such as maximum growth rate and competitive fitness (as is traditionally done in the field, see Lenski et al., 1991; Wiser et al., 2013; Wiser & Lenski, 2015), for practical reasons it was impossible to measure cell and collective fitness over the same timescale, which would have been needed for a meaningful comparison (see Box 1).

Building on this experimental approach and philosophical insights on the concept of fitness from Bourrat (2015a, 2015b), Black et al. (2020) constructed a simple “ecological scaffolding” model that showed how a minimal set of ecological conditions can produce evolutionary dynamics in which particle and collective fitness appear “decoupled”. Population structure creates a tradeoff between short-term growth through particle division

and long term growth through collective persistence. This led Black et al. to conclude that a “fitness-decoupling” observation can be explained in terms of a reduction of *short-term* particle growth rate coinciding with increased collective-level performance (over a *longer* timescale), rather than in terms of transfer of fitness between particles and collectives. We return to this point below and show that particle and collective fitness, when computed within the same reference environment (including timescale), cannot be decoupled.

If it is true that the fitness of cells and collectives cannot decouple, then where does this leave our understanding of dynamic processes that underpin ETIs? The mechanistic approach with an ecological focus is one route (see Black et al., 2020; Doucier et al., 2020), as is the ratcheting-mutation model proposed by Libby et al (2016), but additionally there is a need to identify hallmarks of transitions that might allow experimental validation of transitions in progress, of marginal transitions, or of transitions that are stuck in a simple tradeoff between collective and cell-level traits.

We begin by elaborating on the problem of “fitness decoupling” and stress that the problem, at its core, is not with the sense of complex dynamics expected to unfold when selection moves to operate over multiple timescales (or levels of organisation). Rather, it stems from the fact that the concept is tied to the currency of fitness. In the second section, we provide a population-projection model of an abstract proto-multicellular organism, and show how comparable measures of cell and collective fitness can be obtained, revealing the impossibility of fitness decoupling. The third section shows that the intuited dynamics of transitions are best captured by the language of traits and tradeoffs among traits. Finally, we turn to the challenge of defining essential features of ETIs and argue that events that break the tradeoff between collective and cell-level performance — hereafter referred to as tradeoff-breaking — stand as universal markers of ETI progress.

## 1. Fitness-centered approaches to the study of ETIs and their challenges

One classical way to characterise particle fitness is to measure long-term reproductive success in a given set of environmental conditions relative to other particles (Pence & Ramsey, 2013; Doucier et al., 2021). In a more practical sense, fitness is often measured as a per-capita growth rate, that is, the average number of offspring produced by an individual per unit of time (or per generation) (Fisher, 1930; Metz et al., 1992). Whenever a nested system, composed of particles assembled into collectives, is studied, it is possible to measure at least two kinds of “fitnesses”: the fitness of particles and that of collectives by tallying population growth at each level.

The export-of-fitness model and the concept of fitness decoupling propose that during an ETI, the fitness of particles and collectives of particles become “decoupled” (Michod & Roze, 1999; Michod et al., 2003; Michod, 2005; Shelton & Michod, 2010; Hanschen et al., 2015a, 2017; Shelton & Michod, 2020; Davison & Michod, 2021). More precisely, the two values are predicted not to change in the same way, and even to change in different directions: collective-level fitness increases while individual-level fitness decreases. Note that they are

not expected to necessarily become independent from one another. All that is required for them to become decoupled is that they are anticorrelated or even less correlated. In some stricter formulations of the concept collective and particle fitnesses are said to be decoupled as soon as collective fitness is not proportional to the average fitness of its component particles (Michod et al., 2003; Okasha, 2006). In this section, we review the theoretical and empirical arguments that lead to this prediction.

The idea of fitness decoupling can be traced back to the study of the disruption of higher level-entities by the proliferation of lower-level entities that compose them (see Maynard Smith & Szathmary, 1995, pp. 7–8). If selection acts at two levels during an ETI, why would selection at the lower level (on molecules, cells, organisms) not disrupt the effect of selection at the higher level (on chromosomes, multicellular organisms, insect colonies)? Such “conflicts” pose a challenge for integration at the higher level. This phenomenon is present at all organismal levels. For instance, cancerous cells proliferating at a higher rate than healthy cells pose a threat to organismal integrity (Merlo et al., 2006). Similarly, without suppression from the queen, egg-laying worker bees pose a threat to the integrity of the hive (Amdam & Page, 2010). Other examples include selfish genetic elements which can sometimes produce harmful effects at the organism level (see Werren, 2011 for a review). As a consequence, one may *prima facie* expect evolutionary trajectories to be the result of opposing processes that would be both a hallmark and a significant hurdle for ETIs.

The term “fitness decoupling” was introduced by Michod et al. (2003) to describe the ways by which conflicts between the higher and lower levels of organisation can be resolved during an ETI: “as the evolutionary transition proceeds, group fitness becomes decoupled from the fitness of its lower-level components [...] This transfer of fitness from lower to higher-levels occurs through the evolution of cooperation and mediators of conflict that restrict the opportunity for within-group change and enhance the opportunity for between-group change.” More generally, Hanschen et al. (2017) note that “[a]ny trait that is costly at the lower level but beneficial at the group level enhances the fitness of the group at the expense of lower-level fitness and may therefore contribute to fitness decoupling and the emergence of indivisibility of the group.” Okasha and Michod recast the notion of fitness decoupling in the multilevel selection 1 / multilevel selection 2 (MLS1/MLS2) framework (Michod, 2005; Okasha, 2006, p. 232). Okasha describes collective fitness during the three stages of an evolutionary transition (Okasha, 2006, p. 238): In the first stage collective fitness is defined as average particle fitness (MLS1), secondly, collective fitness is defined as proportional to average particle fitness, and finally, gradual decoupling occurs in the transition toward the third stage, in which the collective fitness is no longer proportional to particle fitness (MLS2). In the “export-of-fitness” framework of ETIs, collectives initially “lack” individuality (fitness of particles and collectives are proportional) and “gain” individuality once their fitness is “transferred” from the underlying particles.

The concept of fitness decoupling has been regarded as one indicator for the ETI from cells to multicellular individuals (Rainey & Kerr, 2010; Pichugin, 2015; Hanschen et al., 2015b; Conlin et al., 2019). In a study using experimental bacterial (*Pseudomonas fluorescens*) populations, Hammerschmidt et al. (2014) and Rose et al. (2020) propagated collectives over multiple generations and then asked whether predicted increases in

collective-level fitness were realised. This was achieved by competing derived collectives against ancestral collectives over the timeframe of a single lifecycle generation: the number of offspring collectives left over this time period was greater in the derived populations (Figure 1a). Next, they sought understanding of cell-level fitness effects. Ideally, such assays would have been performed over an entire collective-level life cycle, but for practical reasons this is nigh impossible. Instead, various cell-level assays were conducted, including assessment of competitive ability in broth culture. Data from these experiments showed cell-level fitness to have declined in derived populations (Figure 1b), at least for the regime in which lineages passed through soma-like and germ-like phases, thus giving the impression that the fitness of cells had decoupled from the fitness of collectives (Figure 1).

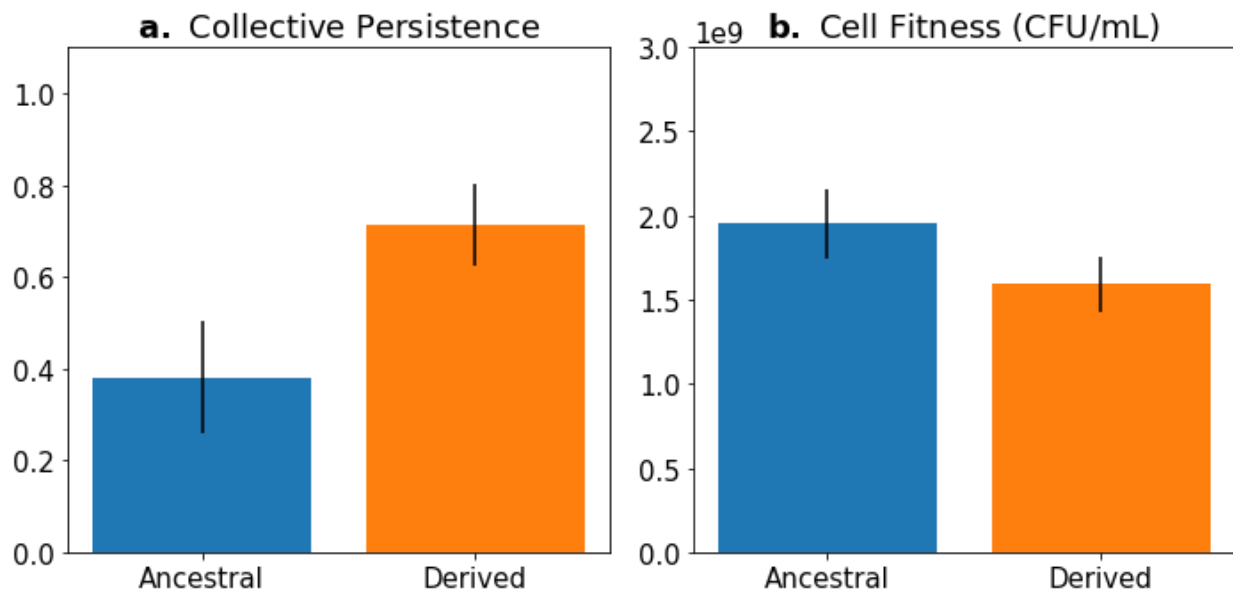

Figure 1 ***Fitness-decoupling observation in the *Pseudomonas* system.*** Comparison of collective-level persistence (measured as the proportion of collective persistence after one generation when competed against an ancestral reference strain) and cell (particle) fitness (measured as the number of cells comprising a collective) for ancestral (blue) and derived (orange) populations under a regime designed to promote an ETI. Error bars represent standard errors of the mean (based on  $n=15$  ancestral and  $n=14$  derived lineages respectively). Redrawn from Hammerschmidt et al. (2014, Fig. 2) for ease of comparison with Figure 5. Protocol described and statistical analysis performed in Hammerschmidt et al. (2014) showing statistical significance between ancestral and derived collective persistence/cell fitness. Dataset published as Rose et al. (2018).

While fitness decoupling and the export-of-fitness model might seem useful concepts for understanding ETIs, we argue here that commensurably computed fitnesses cannot be decoupled. Central to our argument (detailed in Section 2, and Box 1) is the need for measures of cell and collective fitness to derive from analyses performed in the same reference environment and over precisely the same timescale (Black et al., 2020; Bourrat, 2015b, 2015a). In the example discussed above, collective fitness is computed by considering a full collective generation, while particle fitness is computed within collective development. This renders the comparison spurious as

illustrated in Figure 2. Computing the fitnesses at the same timescale, and thus in the same reference environment, would involve simultaneously tallying the increase of individual cells and number of collectives in a timeframe spanning several collective cycles.

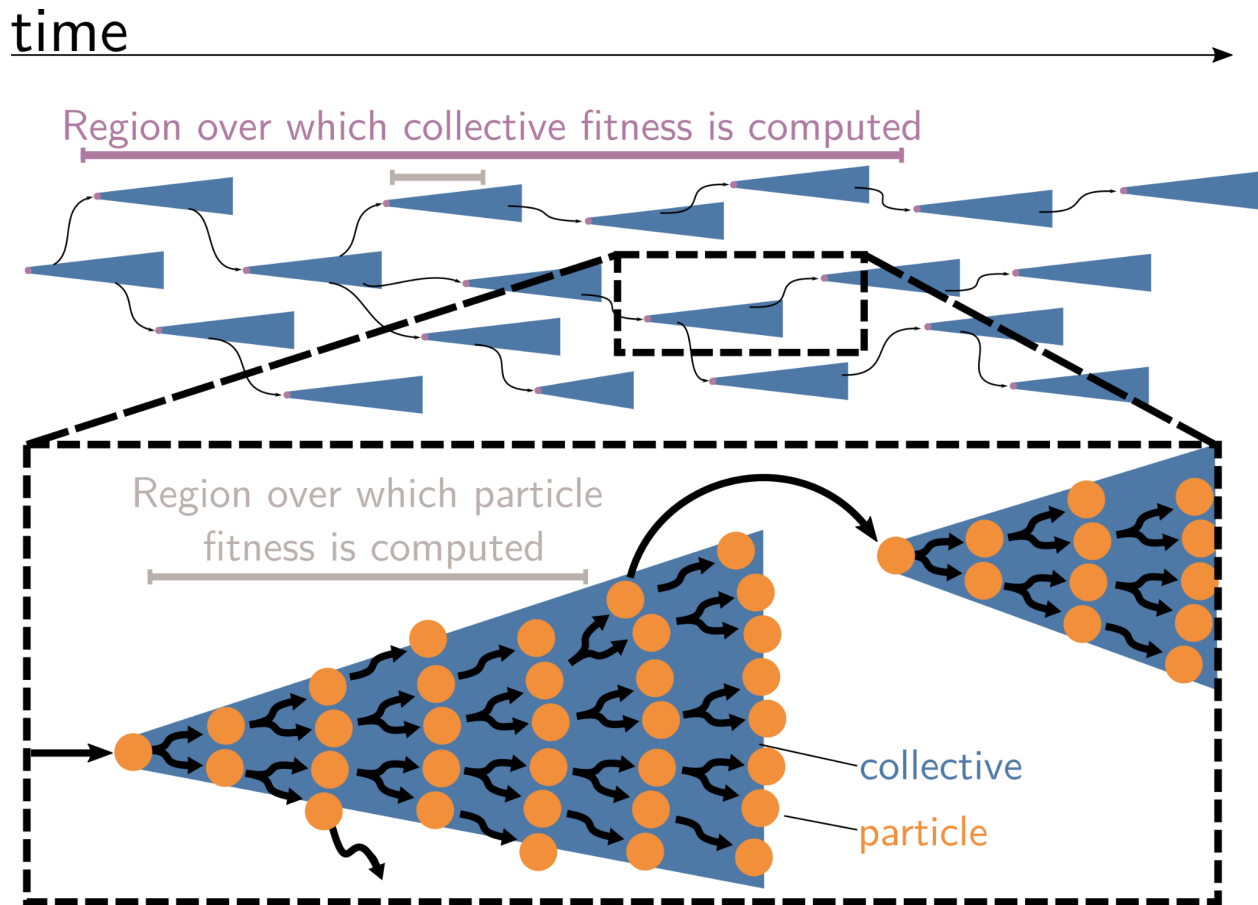

Figure 2 **Collective and individual fitnesses are not measured over the same environment.** During an ETI there are two levels of organisation, collectives (blue triangles) are composed of particles (orange disks); both levels have their own genealogy (black arrows). Collective fitness is computed by considering one or several full collective generations (purple timeline) while particle fitness is computed within each collective development (grey timeline). As a result, they may exhibit opposed dynamics (increasing for collective and decreasing for particle fitness), giving rise to the “fitness-decoupling” observation.

## 2. Commensurably computed particle and collective fitness are equal

In this section, we present a population-projection model of an abstract proto-multicellular organism. We define collective fitness in the context of this model and illustrate the different conventions that can be used to define particle fitness. We provide proof that, under minimal conditions, if particle and collective fitness are computed with respect to the same set of events (i.e., in the same reference environment), they are equal.

### 2.1 Modeling a nested demography

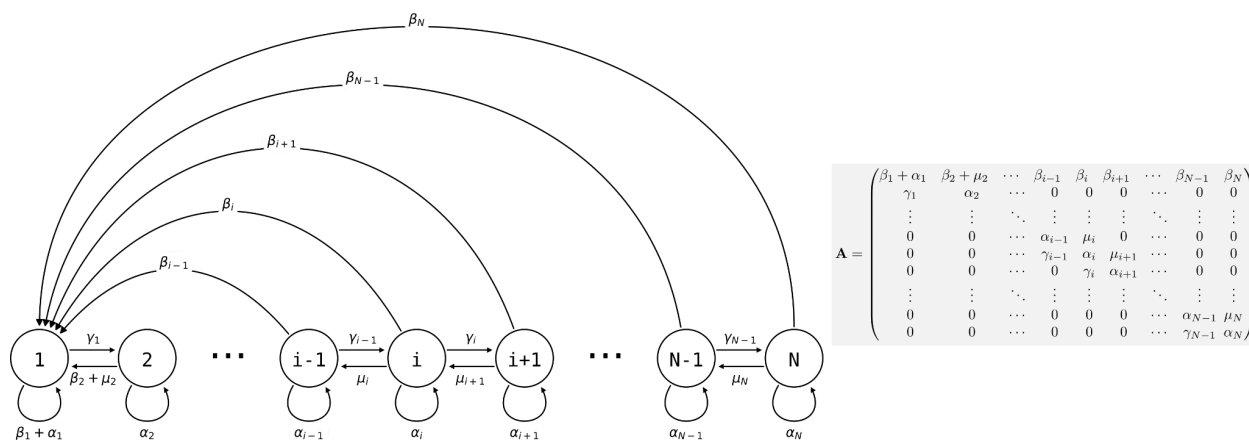

Figure 3 **Life cycle of collectives, as a size-class population projection model.** Circles represent a size class of collectives; arrows represent the flow of individuals between size classes. At each time step, collectives of size class  $i$  can grow (if  $i < N$ ), shrink or stay the same size. They also leave propagules of size class 1. See main text for details.

Consider a population of genetically homogeneous *particles*, structured into *collectives* following the life cycle illustrated in Figure 3. Each collective is characterised by its size, i.e., the number of particles it comprises. At each time step, a proportion  $\gamma_i$  of collectives of size class  $i$  increase to size class  $i+1$ , a proportion  $\mu_i$  shrinks to size class  $i-1$ , a proportion  $\delta_i$  dies and the remaining collectives (i.e. a proportion  $\alpha_i = 1 - \delta_i - \mu_i - \gamma_i$ ) stay the same size. Let  $N$  be the maximum size above which collectives cannot grow. Additionally, collectives reproduce: a collective of size  $i$  produces on average  $\beta_i$  propagules of size class 1 at each time step. Such a life-cycle can be represented as a population projection model, whose dynamics is given by:

$$c_i(t+1) = \sum_{j=1}^N a_{ij} c_j(t),$$

where  $c_i(t)$  is the density of collectives of size  $i$  at time  $t$ , and  $a_{ij}$  is the weight of the  $i \rightarrow j$  edge of the life cycle graph (Figure 3) for all values of  $i$  and  $j$  between 1 and  $N$ . It follows that the population density of particles is given by:



$$n(t) = \sum_{j=1}^N k_j c_j(t),$$

where  $n(t)$  is the number of particles within the population at time  $t$  and  $k_j$  the number of particles corresponding to size class  $j$ . For instance, if we consider that all particles reproduce once for the collective to grow one size class, then  $k_j = 2^{j-1}$ .

## 2.2 Computing collective fitness

We define the fitness of collectives as the Malthusian parameter, or asymptotic exponential growth rate of a population of collectives sharing the same trait value (Metz et al., 1992). If all transitions represented in the life-cycle graph are possible, that is  $0 < \alpha_i < 1 \forall i = 1, 2, \dots, N-1$ , as well as  $\beta_i > 0 \forall i = 1, 2, \dots, N-1$ , then, the matrix  $\mathbf{A} = (a_{ij})_{i,j \in [1,2,\dots,N]}$  is non-negative and primitive. Following the Perron-Frobenius theorem (see Caswell, 1989, p. 57), it means that there exists a positive eigenvalue of  $\mathbf{A}$ , noted  $\lambda$ , called the dominant eigenvalue of  $\mathbf{A}$  with an associated non-negative eigenvector  $\mathbf{w}$ . Moreover, the strong ergodic theorem (see Caswell, 1989, p. 57) shows that the long term dynamics of the population is described by a growth rate  $\lambda$  and a stable population structure  $\mathbf{w}$ . When these assumptions are met, the fitness of collectives is given by :

$$F = \lim_{t \rightarrow \infty} \left( \frac{\ln \left( \sum_{j=1}^N c_j(t) \right) - \ln \left( \sum_{j=1}^N c_j(0) \right)}{t} \right) = \ln(\lambda). \quad (\text{Eq. 1})$$

where the first equality is given by the definition of fitness, and the second by the Perron-Frobenius and strong ergodic theorems, and  $c_j(t)$  is the density of collectives of size class  $j$  at time  $t$ .

## 2.3 Computing particle fitness

In contrast to collective fitness, computing particle fitness is more challenging. There are, *prima facie*, at least three ways to compute the fitness of a particle. Each gives rise to a different measure that we will call  $f_1$ ,  $f_2$  and  $f_3$  (illustrated in Figure 4, their expression for the current model will be given later). To compute:

- $f_1$ , look within each collective and consider the dynamics of the particles. This is equivalent to ignoring all the “between collective” level events (collective births, and deaths). This is what is done experimentally when measuring cell density within isolated collectives (Figure 1, Hammerschmidt et al., 2014).

- $f_2$ , look at a theoretical mono-particle collective. This is equivalent to ignoring all the “within collective” events (collective growth and shrinking). This measure is sometimes called “*counterfactual fitness*” (Shelton & Michod, 2014, 2020) because it is equivalent to the fitness that particles *would* have if they were genetically equivalent (same trait values), but without the ability to produce multi-particle collectives. This is also close to the experimental measurements of cell density performed experimentally (Hammerschmidt et al., 2014, “growth rate” in ED Fig. 4) under conditions preventing the formation of collectives (shaking).
- $f_3$ , take into account all events (i.e., within and between collective), with counts of the number of particles through time.

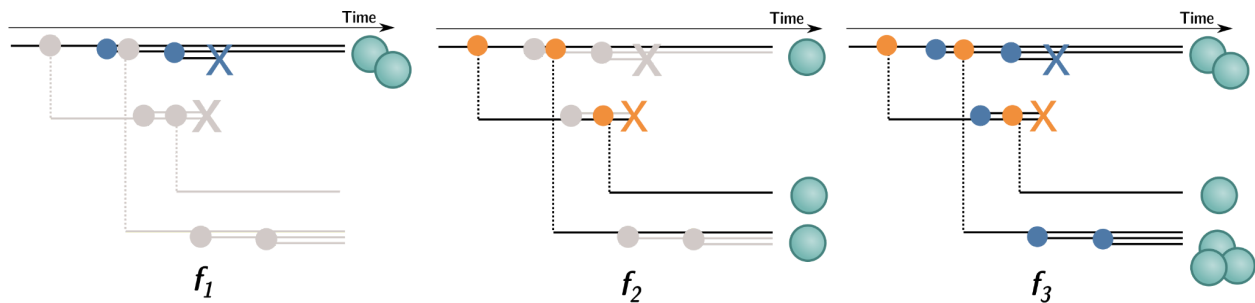

Figure 4 **Three ways to compute particle fitness ( $f_1$ ,  $f_2$  and  $f_3$ ) in a lineage starting from a single particle.** Each horizontal line represents the lifespan of a particle. Births are denoted as circles, death as crosses. Collective birth-deaths are in orange, while particle birth-deaths are in blue. Greyed-out elements indicate the processes that are omitted during the calculation of  $f_1$  and  $f_2$ : In the case of  $f_1$ , between-collective events are ignored (thus, two particles would ultimately be included in the computation), whereas in the case of  $f_2$  within-collective birth-deaths and their effects are ignored (three particles would be included). Finally, in the case of  $f_3$  the full lineage is used (all 6 particles would be taken into account).

Each of these ways to compute fitness differs in the reference environment (including the timescale) used. They can be adequate in different contexts. It is appropriate to measure particle fitness considering within-collective events ( $f_1$ ) only when the evolutionary process studied occurs in the short term. For instance, computing  $f_1$  can tell us which mutant cell lineage can take over within an organism (e.g., cancerous lineages). The counterfactual method  $f_2$  gives information on a “what if” world in which particles cannot be organised in collectives (i.e., in the model, collectives cannot grow  $\gamma_i = 0$ ). It might give information on the unicellular ancestor of a collective. Indeed, a reasonable hypothesis is that the ancestral trait values are the ones that maximise counterfactual fitness (Shelton & Michod, 2020, p. 8).

However, there is no *a priori* reason for the values of  $f_1$ ,  $f_2$ , and  $f_3$  to be equal to each other, or even to change in the same direction when the traits of the organism change. This is clear when considering their expression in

the model. Considering within-collective dynamics (ignoring the effect of density dependence, as is usually done in experiments) gives  $f_1 = \ln(1 - \mu_1 + (k_2 - 1)\gamma_1)$ .<sup>1</sup> In contrast, considering the counterfactual collective dynamics gives  $f_2 = \ln(1 - \delta_1 + \beta_1)$ . Comparing the two equations, we can see that  $f_2$  does not depend on  $g$ . It follows that an increase in  $g$  would result in an increase in  $f_1$  with no consequence on  $f_2$ . *Mutatis mutandis* the same applies for  $\mu$ ,  $\delta$  and  $\beta$ .

The case of  $f_3$  is different. The expression of  $f_3$  is given by the long term exponential growth rate of  $n$  which is a linear combination of exponentially growing terms  $k_i c_i(t)$  and thus grows at the rate of the largest coefficient, giving  $f_3 = \ln(\lambda) = F$ . Note that a change in  $g$  would affect  $f_3$  and  $F$  in the same way. This shows that when the particle fitness is computed with the same frame of reference (i.e., the same environment) as collective fitness (using the same time-scale and the same set of events), their values are (mathematically) equal.

## 2.4 “Fitness-decoupling” observations do little to clarify the process of an ETI.

With these distinctions in place and the constraint that, to be compared, fitnesses must be measured over the same set of events (i.e., same environment over the same timescale) (see Box 1 and Section 1) the apparent contradiction of a simultaneous increase in collective fitness and decrease in particle fitness of a single biological entity is dissolved. To break it down: either fitness at the particle and the collective level are commensurably computed, that is with respect to the same biological object and in the same reference environment, in which case they are equal ( $F$  and  $f_3$ ), or they refer to different biological settings ( $f_1$  or  $f_2$  and  $F$ ) and thus the biological significance of their differential dynamics is not immediately clear. Note that this requires that the population reaches a stable size distribution: only if the collectives are able to grow (or shrink) indefinitely, which is not a realistic assumption for ETIs, could genuine fitness decoupling be observed (see Bourrat, in press, Chapter 5 for details).

Consequently, the observation that  $F$  increases while  $f_1$  or  $f_2$  decreases through time does little on its own to clarify the process of an ETI because they are not commensurable. Such “fitness-decoupling” observations, as we refer to them throughout, can however be understood as a consequence of an underlying tradeoff. The next section introduces a model of such a tradeoff that gives a plausible biological mechanism for the emergence of multicellular collectives under given conditions while displaying a simultaneous increase in  $F$  and a decrease in  $f_2$ .

---

<sup>1</sup> That is, the expected exponential growth rate of a discrete-time branching process (or Bienaymé-Galton-Watson process) where each individual leaves either 0, 1 or  $k_2$  offspring with probabilities  $\mu$ ,  $(1-\mu_1)(1-g_1)$  and  $(1-\mu_1)g_1$  respectively.

### 3. Tradeoffs between particle traits drive ETIs

The previous section showed that if collective and particle fitness are computed in the same reference environment, they are necessarily equal. In addition, it showed that a “fitness decoupling” observation (e.g.,  $f_2$  and  $F$  going in different directions) offers little information about the mechanism of ETIs on its own since there is no reason to relate the dynamics of  $f_1$  or  $f_2$  to the one of collective fitness  $F$  without additional assumptions about the system. In this section, we present an evolutionary model of ETIs that includes these additional assumptions (Section 3.1), describe under which conditions “fitness-decoupling” observations can occur (Section 3.2) and provide an example involving a tradeoff between two traits: the survival of existing collectives and the production of new cells (Section 3.3). This example features an increase of  $F$  and a decrease of  $f_2$  along the evolutionary trajectory. We focus on  $f_2$  because it is more relevant to ETIs: while  $f_1$  has been discussed more strictly in the levels of selection literature,  $f_2$  can be interpreted as the hypothetical fitness an ancestor cell would have (Shelton & Michod, 2020). Nonetheless, the same argument could be made for  $f_1$ .

#### 3.1 Modeling evolution

The demographic model of Section 2 is completed with a model of evolution in two steps. First, consider that the life cycle of collectives (summarised by the matrix  $\mathbf{A}$ ) depends upon a trait  $\theta \in [0, 1]$  whose value can change by mutation. For each trait value  $\theta$ , a corresponding fitness value  $F(\theta)$  exists. Second, we use the simplifying assumptions of Lande’s Equation (Caswell, 1989, p. 164), namely the separation of demographic and evolutionary timescales, and the absence of density-dependent effects. These assumptions lead to the following equation for the evolution of the average trait value  $\bar{p}$  in the population:

$$\frac{d\bar{\theta}}{dt} = \sigma F(\bar{\theta})^{-1} \frac{dF}{d\theta}(\theta = \bar{\theta}) \quad (\text{Eq. 2}),$$

where  $\sigma_\theta \in \mathbb{R}_+$  is the variance of mutation effects on the trait  $\theta$ . As a consequence, the model predicts that the average value of the trait  $\bar{\theta}$  will “climb up” the fitness gradient  $\frac{dF}{d\theta}$ .

The ancestral phenotype, i.e. the initial condition  $\bar{\theta}(t = 0)$  of the evolutionary trajectory will be taken to be  $\theta_0$ , the optimal trait value for the ancestral unicellular organism. Thus  $\theta_0 = \arg \max_{\theta} f_2(\theta)$ , where  $f_2(\theta)$  is the value of  $f_2$  for an organism with trait  $\theta$ . Similarly, let  $\theta^*$  be the optimal trait value for the collective,  $\theta^* = \arg \max_{\theta} F(\theta)$ . The code implementing this model and drawing the figures presented here is available as supplementary material (doi: 10.5281/zenodo.5352208). It makes use of the Matpopmod library (Bienvenu & Doulcier, 2021).

### 3.2 Conditions for “fitness-decoupling” observations between $f_1$ or $f_2$ and $F$

Once a mutation (or change in the environment) makes the first multi-particle collective possible, the process that drives population dynamics is one associated with  $F$ . A sufficient condition for “fitness decoupling” observations to be possible would be that the trait values that are optimal for single-particle collectives ( $\theta_0$ ) are not optimal for multi-particle collectives ( $\theta^* \neq \theta_0$ ), provided the fitness landscape is smooth enough (and both  $F$  and  $f_2$  are continuous functions of  $\theta$  with a single maximum value). Thus, as selection acts during the ETI and drives the trait values toward fitter collectives (toward  $\theta^*$  the optimal value for  $F$ ), it would necessarily lead to less fit “counterfactual” single-particle collectives (away from  $\theta_0$  the optimal value for  $f_2$ ). Conversely, a sufficient condition to observe “coupling” between  $f_2$  and  $f_3$  (or  $F$ ) would be that the optimal trait values for these two measures coincide ( $\theta^* = \theta_0$ ) and that the ancestral trait was not optimal. Then, the evolutionary trajectory of the population would tend toward traits with a higher value of  $F$  and, coincidentally, toward higher values of  $f_2$ .

### 3.3 An example: the tradeoff between collective growth and persistence

Let  $\theta \in [0, 1]$  be a trait that controls the relative investment of the particles toward collective survival and collective growth modeled by parameters  $s$  and  $b$  such that  $s = \theta$  and  $b = 1 - \theta$ . More precisely, let the probability for a collective of size class  $i$  to survive a single time step be  $p_i$ , with  $p_1 \in [0, 1]$  and for  $i = 2, \dots, N$ ,  $p_i = 1 - e^{-\eta s}$  (where  $\eta$  is a scaling factor). Let the probability for a collective of size class  $i$  to grow to the next class size during a time step be  $g_i$ , with  $g_i = 1 - e^{-\eta b}$  for  $i = 1, \dots, N - 1$  and  $g_N = 0$ . Additionally, let the expected number of propagules shed by a collective of class size  $i$  be  $m_i = \eta b k_i$ . Thus, following the Birth-Flow Class structured model (Caswell 1989 pp. 83-93), the matrix projection model from Figure 3 is parameterized as such:  $\alpha_i = p_i(1 - g_i)$ ,  $\gamma_i = p_i g_i$  and  $\beta_i = p_1^{0.5} \frac{1}{2} ((1 + \alpha_i)m_i + \gamma_i m_{i+1})$ . For this example, consider that collectives cannot shrink by setting  $\mu_i = 0$ .

In this model, the optimal trait value for counterfactual ( $f_2$ ) fitness is always a null investment in collective survival  $\theta = 0$ . However, the optimal trait value for whole lifecycle fitness ( $F$ ) is  $\theta > 0$ . Thus, if a population starts with the optimal trait value for the counterfactual fitness  $\theta_0 = 0$ , it will evolve toward the optimal value  $\theta^* > 0$  (green arrow, Figure 5). Over time, collective-level fitness  $F$  increases while counterfactual fitness  $f_2$  decreases.

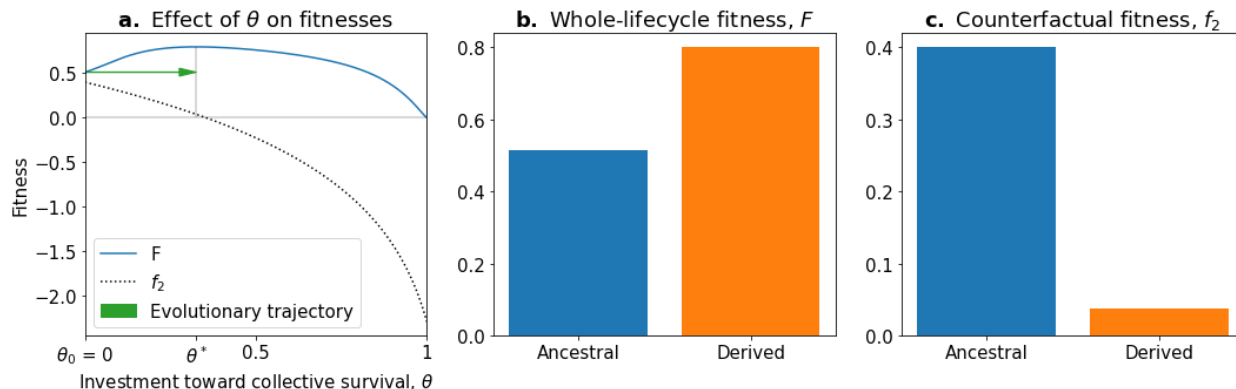

**Figure 5** *The tradeoff model can reproduce the “fitness-decoupling” observation. a.* Values of  $F$  and  $f_2$  as a function of the trait  $\theta$ . *b.* Ancestral and derived values of whole-lifecycle fitness ( $F$ ). *c.* Ancestral and derived values of counterfactual fitness ( $f_2$ ). The expected evolutionary trajectory from ancestral ( $\theta_0$ ) to derived ( $\theta^*$ ) trait value (green arrow in a.) results in an increase of  $F$  and a decrease of  $f_2$  reproducing the “fitness-decoupling” observation of Figure 1. Parameters:  $N = 30$ ,  $\eta = 8$  and  $p_1 = 0.1$ .

This evolution towards higher values of  $\theta$  (because it increases  $F$ ) coinciding with a decrease in  $f_2$  leads to a “fitness-decoupling” observation. Note, importantly, that the opposite directions of the dynamics of  $F$  and  $f_2$  is a consequence, not a cause, of the underlying tradeoff mechanism that drives the evolutionary dynamics. Furthermore, the same observation will be made in any situation in which short-term costs are compensated by long-term benefits, not solely during ETIs. In the next section, we propose instead that one genuine marker for an ETI is the capacity for a lineage to break away from such a tradeoff. Patterns of tradeoff breaking correspond with the emergence of novel collective-level traits-- i.e., traits that can only be exhibited in a collective context-- and as such provide an evolutionary cause of ETIs.

## 4. Tradeoff-breaking as markers of ETIs

In the previous section, we saw that a tradeoff between traits can result in an empirical “fitness-decoupling” observation. Evolutionary tradeoffs between traits are a consequence of the genetic background of organisms and their environment. Thus, they are not immutable and can evolve provided some changes in the genetic background or the environment occur. In this section, we propose that a marker of ETIs is “breaking” from the initial tradeoff (hereafter called “tradeoff-breaking” observations). To explain this phenomenon, we present a modification to the model described in Section 3 (called the “tradeoff-breaking” model).

A tradeoff is essentially a constraint on the combined values of a set of traits: something that prevents a given organism from simultaneously performing well in two or more functions, for instance, growth and survival or photosynthesis and nitrogenase activity in cyanobacteria as discussed below. Thus, if a mutant lineage is able to bypass the tradeoff and perform well in the two functions, it is expected to be fitter than its ancestor, and

increase in proportion in the population. In some cases, mutations that lead to a multicellular morphology might be a necessary step toward bypassing or breaking the tradeoff. This provides an “adaptive” explanation for the emergence of multicellular organisms. This adaptive scenario has two steps. First, collectives (i.e., multicells) emerge by mutations constrained by the tradeoff. Second, the long-term persistence of multicells is rendered more probable by tradeoff-breaking mutations that would not have been possible, or would not have broken the tradeoff had they occurred in their unicellular ancestors.

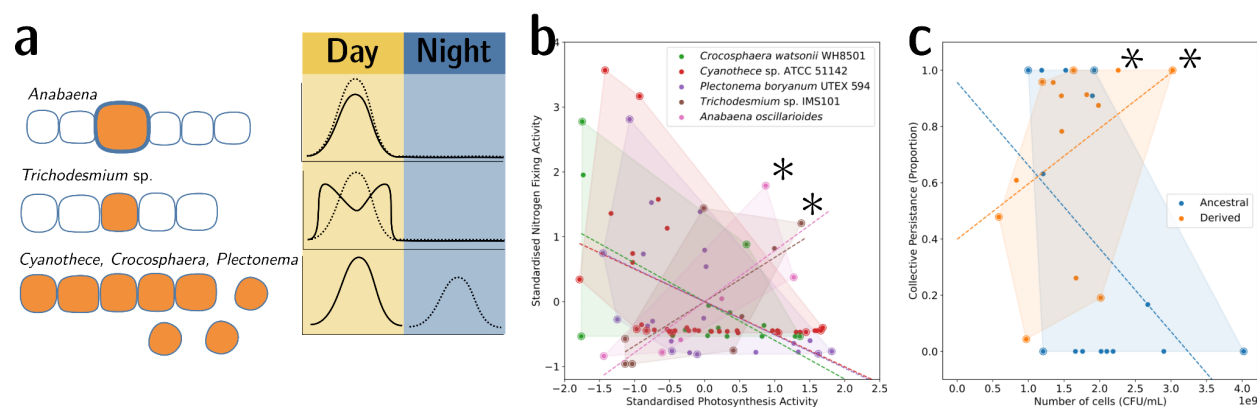

**Figure 6 Tradeoff-breaking lineages can be inferred experimentally.** **a.** Morphological and physiological  $N_2$ -fixing adaptations for different cyanobacteria. Orange shaded areas indicate nitrogenase localization. Daily rhythm of photosynthesis (solid line) and  $N_2$  fixation (dashed line) (modified from Berman-Frank et al., 2003). **b.** Tradeoff between photosynthesis activity and nitrogenase activity in cyanobacteria (data taken from Colon-Lopez et al 1997; Mohr et al 2013; Misra & Tuli 2000; Berman-Frank et al 2001; Popa et al. 2007 and standardised). The shaded area for a given species corresponds to the convex hull of observations. Assuming a representative sampling, it stands for the expected range of traits accessible for this species. Dashed lines are least-square linear regressions of the observations of each species; asterisks indicate potential “tradeoff-breaking” observations because they notably depart from the tradeoff pattern displayed by most species. **c.** Tradeoff between collective persistence and cell number in *Pseudomonas fluorescens* for ancestral and derived lineages (Hammerschmidt et al., 2014, asterisks indicate tradeoff-breaking observations in two lineages). Dataset published as Rose et al. (2018).

To illustrate this point, we provide two examples from biology. The first one is the well-understood tradeoff between photosynthesis and nitrogen fixation -- from dinitrogen gas ( $N_2$ ) -- in cyanobacteria. The tradeoff is caused by the oxygen sensitivity of the enzyme nitrogenase, which catalyses the process of reducing  $N_2$  to ammonia ( $NH_3$ ). This prevents cells from performing both functions simultaneously and has resulted in several morphological and physiological adaptations (Figure 6a). In the unicellular species, *Cyanothece* sp. ATCC 51142 and *Crocospaera watsonii* WH8501, and the undifferentiated filamentous *Plectonema boryanum* UTEX 594, the two functions are temporally separated by a circadian rhythm: the oxygen-sensitive  $N_2$  fixation is performed during the night, unhindered by the oxygen-producing photosynthesis during the day. When plotting the activity values for photosynthesis and  $N_2$  fixation for populations of these species, they fall on both sides of the tradeoff -- depending on the time of the day (Figure 6b). In the morphologically undifferentiated filamentous multicellular *Trichodesmium* sp. IMS101, the two functions are performed simultaneously -- but in different,

morphologically identical, cells of the filament -- thus the values for these populations are located in the middle of the tradeoff -- they perform averagely in both functions. This pattern can also be seen for populations of the highly differentiated filamentous *Anabaena oscillarioides*, which perform even better than the undifferentiated *Trichodesmium* sp.. This can be explained by the presence of differentiated cells, heterocysts, that only fix N<sub>2</sub>, and exchange the fixed nitrogen compounds against carbon products with the photosynthesizing cells of the filament. This example seems to be compatible with the tradeoff-breaking framework -- both multicellular and (physiologically) differentiated species, *A. oscillarioides* and *Trichodesmium* sp., seem to have broken away from the tradeoff, which leads to tradeoff-breaking observations in Figure 6b (indicated by asterisks).. Moreover, photosynthesis and nitrogen fixation are positively associated, as indicated by the regression line. Overall, the example of cyanobacteria illustrates how tradeoff-breaking can occur -- multicellular differentiated morphology and designated N<sub>2</sub>-fixing cells allow the organisms to break away from the tradeoff that is present in the unicellular and physiologically undifferentiated phyla (visible in Figure 6b as the three negative regression lines).

The second example is the evolved *Pseudomonas fluorescens* populations, where tradeoff breaking seems to have occurred in some of the evolved lineages. In this case, the tradeoff implies that collective persistence cannot increase concomitantly with cell number. However, in the experiment of Hammerschmidt et al. (2014), two lineages have succeeded in doing that, leading to two tradeoff-breaking observations visible in Figure 6c (indicated by asterisks). Here, collective persistence increased because of the evolution of a *mutS*-dependent genetic switch that enabled rapid and predictable transitioning between two stages of a life cycle. This increase in collective persistence is not accompanied by a decrease in cell density, as is the case in other lineages, characterizing those two lineages as breaking away from the tradeoff.

The model presented in Section 3 cannot account for such changes affecting the traits, for example through mutations. To do so, it must be modified into what we refer to as the “tradeoff-breaking” model. In the model presented in Section 3, the traits survival  $s$  and growth  $b$  were linked by a deterministic relation through the investment trait  $p$ :  $s = p$  and  $b = 1 - p$ . Thus any mutation affecting one trait necessarily leads to opposite effects on the other. This assumption can be relaxed, allowing the two traits to take any pair of values. To keep modelling the tradeoff, we suppose that the distribution of mutational effects (the mutation kernel) is a two-dimensional Gaussian distribution with a high (negative) correlation value ( $\rho = -0.9$ ). This means that most mutations that increase one trait value, reduce the other. However, and this is crucial, some rare mutations have the effect of increasing or decreasing both values, something that was impossible in the model described in Section 3. Thus Eq. 2 becomes:

$$\frac{d}{dt} \begin{pmatrix} s \\ b \end{pmatrix} = F(s, b)^{-1} \begin{pmatrix} \sigma_s^2 & \sigma_s \sigma_b \rho \\ \sigma_s \sigma_b \rho & \sigma_b^2 \end{pmatrix} \nabla F(s, b) \quad (\text{Eq 3}),$$

where  $F(s, b)$  is the whole-lifecycle fitness as a function of the traits, and  $\nabla F(s, b)$  is the fitness gradient in the two-dimensional trait space,  $\sigma_s$  and  $\sigma_b$  are the variance of mutational effects on  $s$  and  $b$  respectively. Figure 7 shows the trajectory resulting from this model. Initially, the population moves along the tradeoff in the trait-space: reducing the value of  $b$  and increasing the value of  $s$ . This reflects how “low-hanging-fruit”



mutations -- mutations that are more frequent because of the skew in the mutational effect distribution -- drive the initial dynamics. This first, fast-paced phase of the dynamics ends when the population reaches the neighbourhood of the optimal organism that lies on the tradeoff line  $s = (1-b)$  (around  $t_1$ ). Then, a second slower part of the dynamics starts and leads to a tradeoff-breaking observation (the population “breaks away” from the tradeoff line, Figure 7a after  $t_1$ ). This second part is slower because mutations that move collectives in this direction are statistically less likely to occur. Figure 7b shows that observation of “fitness-decoupling” between  $f_2$  and  $F$  could only be made in the first part of the trajectory. However, the whole trajectory is characterised by an increase in fitness  $F$ , as discussed in Section 3.

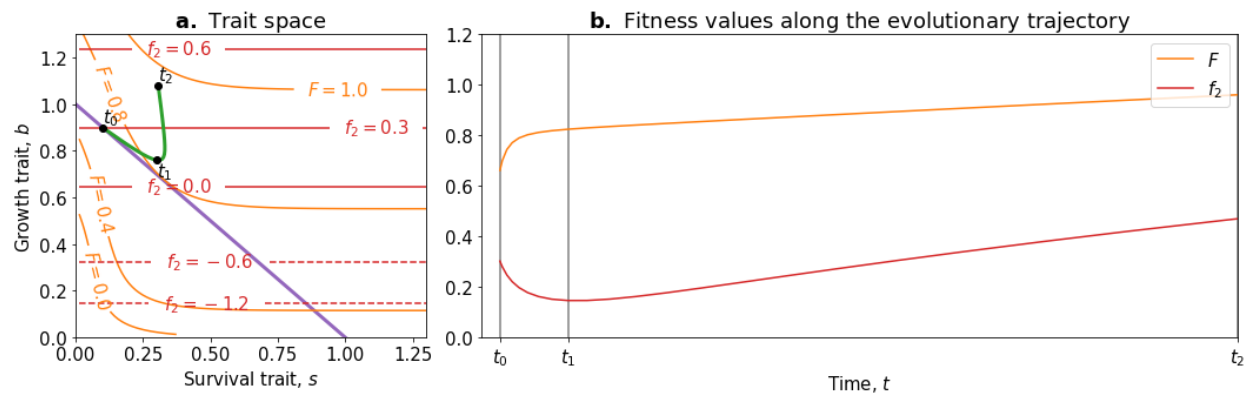

**Figure 7 Tradeoff-breaking mutations do not fit the “fitness-decoupling” observation.** **a.** Trait space with isolines of fitness. An example of a possible evolutionary trajectory is shown in green; **b.** Particle (counterfactual --  $f_2$  in red) and collective fitness ( $F$  in orange) values along the example evolutionary trajectory (in green). The strict tradeoff from Section 3 and Figure 5 is shown in purple. The times marked by vertical lines in **b** correspond to the dots in **a**. The evolutionary trajectory can be separated into two parts: a first fast-paced part (before  $t_1$ ) that closely follows the purple tradeoff in **a**, and a second slower part (after  $t_1$ ) that breaks away from it and leads to the “tradeoff-breaking” observation. Note that a “fitness-decoupling” observation can only be made in the first part of the trajectory (before  $t_1$ ) as represented in **b**. Parameters:  $N=15$ ,  $p_1 = 0.1$ ,  $\eta = 8$ ,  $\rho = -0.9$ .

Our model gives a simple mechanism that can reproduce the experimental “fitness-decoupling” observation as well as the tradeoff-breaking observations due to rare mutants. Specifically, we observe that the trajectory resulting from the model is mirrored by the trajectory of lineages in the evolved *Pseudomonas fluorescens* populations (Hammerschmidt et al. 2014). When compared to the ancestral lineages, most of the evolved lineages appear to have been constrained by the tradeoff and increased in collective persistence at the expense of cell density (through “low-hanging-fruit” mutations, as is the case between  $t_0$  and  $t_1$  in Figure 7). Notably, only the two outlier lineages (marked by asterisks in Figure 6c) seem to have started to break away from the tradeoff – they seem to have reached the slower part of the evolutionary dynamic (where less likely mutations are explored as is the case between  $t_1$  and  $t_2$  in Figure 7). Tentatively, the fact that only the two outlier lineages broke away from the tradeoff might be due to a higher mutation rate increasing the relative speed of evolution compared to the other lines. According to our “trade-off breaking” framework, the “fitness decoupling” observation should be re-interpreted as lineages being in the first part of the trajectory. Moreover, the tradeoff-breaking lineages

should be explored (as done in Hammerschmidt et al. 2014 to an extent) as we advocate that tradeoff-breaking observations are the mark of significant genetic innovation, and thus can be used as a hallmark of ETIs.

The tradeoff-breaking model presented here is compatible with a number of different models of ETIs recently proposed in the literature. Among them are two models which we think could benefit from being seen through the framework we developed here, as they illustrate a diversity of mechanisms that yield initial tradeoffs and tradeoff breaking mutations: The ratcheting model proposed by Libby and collaborators (Libby et al., 2016; Libby & Ratcliff, 2014) and the ecological scaffolding model proposed by Black et al. (2020). Furthermore, recasting these two models in terms of tradeoff breaking yields new insights which are detailed in Box 2 and 3 respectively.

In the ratcheting model, proto-multicellular organisms are in an environment alternating between multicellular-favouring and unicell-favouring. This yields a tradeoff between the two states and the selection for a high probability of multicells to revert to unicells. Some mutations (“ratcheting (type 1) mutations”) are assumed to be beneficial in a collective (multicellular) environment while deleterious in a unicellular context and play the tradeoff-breaking role. Libby et al. (2016) showed, through simulations, that the accumulation of ratcheting mutations makes it harder for the reversion of a multicellular organism back to a unicellular state even when the environment becomes favourable for unicellularity.

In the ecological scaffolding model, the environment, structured both spatially and temporally, allows for the selection of collective level properties without the need to assume anything about the particles other than that they reproduce at different rates. Black et al. showed that the tradeoff stems from the population structure: reductions in cell growth rate are favoured because of benefits to collectives that are realised via improvements in dispersal. The emergence of specialised soma cells is an example of tradeoff breaking: it allows an increase in collective dispersal without requiring as much cell growth reduction.

Both models illustrate the flexibility of our tradeoff and tradeoff-breaking approach: First, it allows multiple mechanisms of evolutionary transitions to be formalised in a unified way. Second, tradeoff-breaking observations can be used as a general marker across various mechanisms of evolutionary transitions.

## **5 Discussion: Beyond fitness decoupling**

Fitness-centered approaches to ETIs have been influenced by the concept of “fitness-decoupling” between lower-level particles and higher-level collectives. In this view, fitnesses of particles and collectives are initially proportional to one another but they come apart as an ETI occurs: particle fitness decreases while collective fitness increases. This interpretation comes with some inconveniences. First, fitness is notoriously hard to define and measure. This in turn makes fitness comparisons across levels difficult. Second, fitness values in and of

themselves do not provide a mechanistic model of the system. Progress in understanding ETIs relies on our ability to circumvent limitations inherent in the currency of fitness. We suggest that focusing on traits and tradeoffs between traits rather than focusing on fitness to study ETIs is both more parsimonious and practically achievable. Finally, we propose that a general marker of ETIs to use in lieu of fitness decoupling is the emergence of rare tradeoff-breaking mutations.

Our first main finding is the impossibility of decoupling between commensurable measures of fitness. Starting from the recognition that fitness is a concept difficult to define consistently (Abrams, 2012; Ariew & Lewontin, 2004; Doucier et al., 2020), the problem is magnified when the entities to be compared belong to different levels of organisation. As we discuss in Section 1 (and Box 1), experimentally comparing fitness in such cases would require being able to measure the growth rates in the same environment at different levels of organisation, something that proves challenging. Even if such a comparison could be made, fitness measures at different levels of the same biological substrate necessarily lead to the same outcome at any level. We show this point formally in Section 2. In particular, commensurability is assured by taking care to use the same set of events (same reference environment and same time-scales) for both measures. Once this is ensured, fitness decoupling is not observed. Thus, our analysis reveals that “fitness-decoupling observations” result from incommensurable fitness measurements. We formally confirm the analysis provided by Bourrat (2015a,b; see also Black et al. 2020) who qualifies such observations as artefacts of descriptions. This contradicts the idea that they stem from an export-of-fitness (see Michod et al., 2003; Michod, 2005; Okasha, 2006, 2009; Folse & Roughgarden, 2010).

Our second main finding is that fitness decoupling observations cannot be reliably used as a marker for ETIs, and we propose tradeoff-breaking observations as an alternative. In Section 3 we clarify the conditions under which a fitness decoupling observation (between incommensurable fitness measures) could in principle be made: using a simple tradeoff model between traits values we find that one condition is that the optimal trait value for counterfactual particle fitness and whole-lifecycle fitness are different. In Section 4, we show that if the tradeoff is relaxed through the existence of rare-tradeoff breaking mutations, fitness-decoupling observations may not hold for whole evolutionary trajectories. Overall, an evolutionary trajectory can be divided into two parts: a first fast-paced optimization “on the tradeoff”, and a second slower driven by rarer tradeoff-breaking. Tradeoff-breaking mutations might result in lineages in which both counterfactual and whole-lifecycle fitnesses are increased compared to the ancestor, contrary to the expectation of the export-of-fitness model. Tradeoff breakings are already considered key events in the evolution of body plans and are expected to be a widespread mechanism for the emergence of novelties (Galis & Metz, 2007; de Vos et al., 2015). We propose that departures in collective-level entities from ancestral tradeoffs--tradeoff breaking points--are a mark of a key moment of ETIs and might be used to characterise them. This proposal is compatible with recent models found in the literature on ETIs, namely the ecological scaffolding model (Black et al., 2020; Doucier et al., 2020) and the ratchet model (Libby et al., 2016; Libby & Ratcliff, 2014) that provide alternative mechanisms for both tradeoffs and tradeoff-breaking observations. Furthermore, we show that it is also compatible with experimental data on cyanobacteria (Colón-López et al., 1997; Misra & Tuli, 2000; Berman-Frank et al., 2003; Popa et al., 2007; Mohr et al., 2013) and *Pseudomonas fluorescens* (Hammerschmidt et al., 2014; Rose et al., 2020).

Our tradeoff-breaking framework could serve as a stepping stone to generate new hypotheses. The study of tradeoff-breaking requires estimating changes between the pre-ETIs ancestral traits (e.g. unicellular) and post-ETIs derived traits. Access to ancestral traits can be gained in multiple ways depending on the system studied. First, through phylogenetic reasoning (e.g. by reconstructing the sequence of ecological and phenotypic trait evolution during the evolution of cyanobacterial multicellularity, as in (Hammerschmidt et al., 2021). Second, by assuming that the ancestral traits are close to the optimal values with respect to the counterfactual particle “outside of the collective.” This method described by Shelton and Michod (2020), once separated from the export-of-fitness model, would prove useful here. Third, through direct measurement during experimental evolution studies (Ratcliff et al., 2012; Hammerschmidt et al., 2014; Herron et al., 2019). Additionally, statistical methods to better characterise tradeoff-breaking should be developed.

Fitness-centered approaches to ETIs may have reached their limits. We propose to refocus the problem on tradeoffs between traits, bypassing the difficulties inherent to fitness comparisons. The advantages of this move are multiple and range from allowing better experimental accessibility to leading to a more mechanistic theory. The way the collective-level context affects the constraints that link traits together is the linchpin of our framework. In particular, we argue that tradeoff-breaking events represent a mark of significant evolutionary innovations toward individuality at the higher level that might be missed by fitness-centered approaches.

## Box 1. Comparing Fitnesses

Determining whether the fitness of an entity is higher or lower than that of another entity requires obtaining fitness estimates for the two entities.

A conventional fitness estimate, although one that does not come without problems (see below), is the expected number of offspring after one generation. For this estimate to be adequate for the purpose of comparison, the generation time of the two entities must be the same. As soon as the entities under scrutiny have different generation times, comparing their fitness using the expected number of offspring per generation is not enough. To see this point, suppose two entities *A* and *B* which have the same reproductive output after one generation, but, everything else being equal, *A* reproduces *faster* than *B* because it has a shorter generation time. Over the same absolute period of time, *A* will have a higher number of descendants than *B*, and one could infer that *A* is fitter than *B*. (Note that this is true whether generations are overlapping or not). Figure B1a and b illustrate the situations, respectively, in which a fitness comparison is made based on generational (and thus invalid) and absolute times (valid).

A more appropriate measure for the purpose of fitness comparison when generation times differ between the focal entities is the long term growth rate of the population or the Malthusian parameter. These values are

often computed from empirical actuarial tables using population projection models (see Caswell, 1989), or on the repeated census of the population (e.g. in microbiology).

However, long-term growth rates can only be compared if they are made over the same set of events. Any observation in which one entity appears fitter than the other, but for which a different set of events has been used (different timescale or different environment) could in reality be one in which there is no difference between the two. In other words, it could be a spurious observation.

To take an example in which the two environments, rather than the times over which reproductive outputs are measured, are different, consider two identical plants receiving different amounts of resources. The plant receiving more resources produces more seeds. Yet, this difference in reproductive output cannot lead to the conclusion that these two plants have different fitnesses where “fitness” is associated with natural selection. In our example, because the two plants are initially identical they necessarily have the same fitness. This situation is depicted in Figure B1c and d. In Figure B1c, the fitnesses are compared in two different environments and the comparison is thus invalid while in Figure B1d, the comparison is made in the same environment.

In some situations where one wants to make fitness comparisons, the environment presents fluctuations in time. In this case too, to be comparable they must refer to the same set of events. For instance, if  $A$  is in environment 1, and  $B$  is successively in environment 1 and 2, then the two resulting fitness values are not comparable because they do not inform one of the potential outcomes of competition in environment 1, in environment 2, or in a temporal succession of the two. This invalid comparison is represented in Figure B1e. A condition for comparison, taking into account environmental change, is thus that the two organisms follow the same temporal succession of environments, as presented in Figure B1f. Note importantly that we assume here that whether an entity is in a given environment is independent of its type. If a dependence of the environment on the type exists, this environment effectively becomes an extended phenotype (Lu and Bourrat 2018).

If the environmental changes are not deterministic, a weaker condition than the same temporal succession of environments is that the two organisms experience the same distribution of environments and transition probabilities between environments (steady-state) (see Doucier et al., 2021). This type of scenario is not discussed in the main text (but see Box 3).

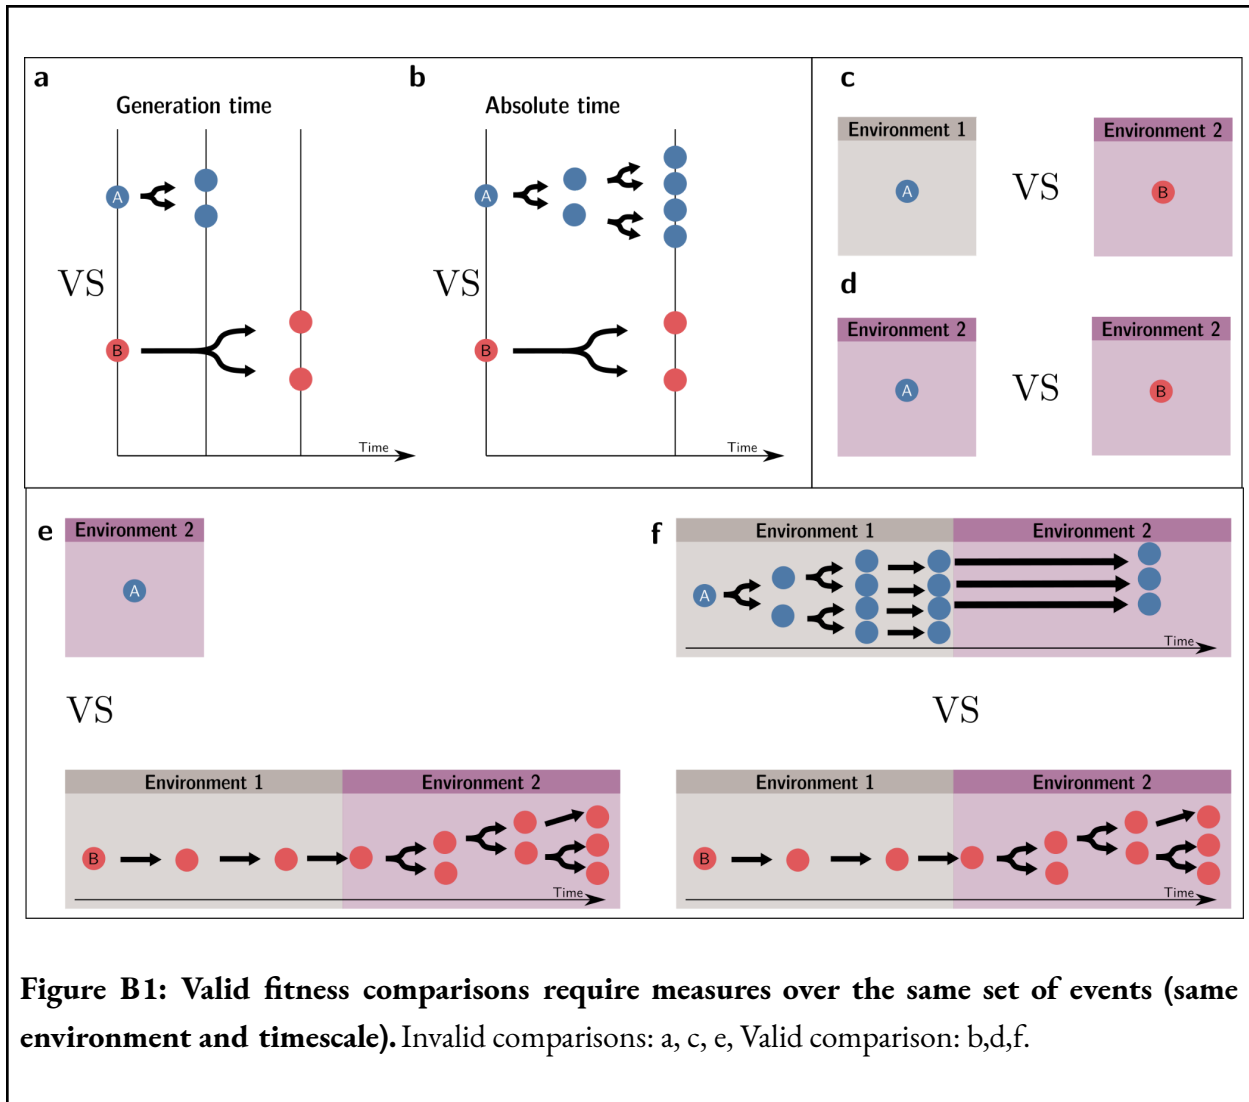

## Box 2. Ecological Scaffolding and Tradeoff-Breaking

Population structure can lead to the kind of tradeoff presented in Section 3 as seen in the ecological scaffolding scenario for the origin of multicellularity (Black et al., 2020). In this scenario, the population of particles is structured in patches of finite resources with dispersal between patches. The tradeoff evident in this model is between trait values that enhance particle performance within patches and trait values that favor dispersal to new patches. The evolutionary dynamics of two particular traits is studied: particle growth rate, and production of soma-like particles that do not disperse themselves but favor the dispersal of the other particles in the patch. In this box, we show how the model of Black et al. (2020) captures the concepts of tradeoff and tradeoff-breaking presented in the main text.

### Ecology

We model the dynamics of germ cells ( $g$ ), soma cells ( $s$ ) and resources ( $r$ ) within collectives. Two traits can mutate: the growth rate of germ cells  $\beta$  and the proportion of soma cells that are produced by germ cells  $q$ . The ecology within a patch is given by:

$$\begin{cases} \frac{dg}{dt} = N^{-1}\beta(1-q)r(t)g(t) - g(t) \\ \frac{dr}{dt} = -N^{-1}\beta r(t)g(t) - dr(t)s(t) \\ \frac{ds}{dt} = N^{-1}\beta qr(t)g(t) - s(t) \end{cases}$$

Where  $N$  is the carrying capacity of a patch and  $d$  the rate at which soma cells consume resources. Initial conditions at the beginning of each generation are taken to be:  $g(0) = 1$ ,  $r(0) = N$ , and  $s(0) = 0$ . Thus, at the beginning of a collective-generation, there is only a single germ cell in the collective. Note that if  $q = 0$ , there are never any soma cells in the model (for any point  $t$ ,  $s(t) = 0$ ).

The weight of a patch  $w$  in the dispersal phase is given by  $w = (1 + \rho s(T))g(T)$  where  $T$  is the duration of the growth phase and  $\rho$  is the advantage in dispersal conferred by the soma cells. If  $\rho = 0$ , the soma cells do not affect the dispersal.

### Fitnesses

In this model, the within-collective fitness of cells  $f_1$  (ignoring inter-collective events, and density dependence

within collectives), is:  $f_1 = \left. \frac{d(s(t) + g(t))}{dt} \right|_{s,r,g=(1,N,0)} = \beta$ . The counterfactual fitness  $f_2$  is computed assuming that collectives give rise to free living cells at rate  $\beta$  (and not allowing the production of soma-cells) thus  $f_2 = \beta$ .

Computing the whole life-cycle fitness  $F$  (or  $f_3$ ) is more challenging since there is (some) density dependence between collectives. However, since collective generations are non-overlapping and collectives only reproduce once (at the end of their life), the only number that matters, in the long run, is the weight of a patch (the number of dispersing propagules) at the time of dispersal:  $F \approx w$ .

Figure B2a shows the set of accessible phenotypes when mutations occur on either  $\beta$  or  $q$ . From this figure, it is possible to predict what will happen in a hypothetical scenario of sequential mutations on  $\beta$  then  $q$ . Starting from point  $a$ , if only  $\beta$  is able to mutate, we can expect the population to move to  $b$  (the highest value of  $F$  for  $q = 0$ , while  $f_2$  decreases), optimising the tradeoff. If mutations affecting  $q$  become possible once the population reaches  $b$ , then the population is expected to evolve toward  $c$ , without change in  $f_2$ , breaking the previously defined tradeoff. This requires that mutations happen on one trait, and then the other. This assumption can be relaxed by using the same method as in Section 4.

### Evolution

Let  $\theta = (q, \beta)$  be the vector of traits. We compute the evolutionary trajectory using the same Lande-Equation model as in Section 4 Eq 3.  $G$  is the variance-covariance matrix of mutational effects. In this example, consider that mutational effects on both traits are not-correlated ( $\rho = 0$  using the notation of the main text), and that the mutational effect variance for  $\beta$  is much higher than for  $q$ :  $\sigma_\beta = 0.1$  and  $\sigma_q = 0.001$ . This assumes that most mutations have a higher effect on  $\beta$  than  $q$ .

Figure B2b and B2c show a trajectory simulated this way, with initial conditions  $(q_0, \beta_0) = (0, 1.8)$  and displays a dynamic akin to the one in Section 4. First, a fast-paced regime, in which frequent ‘‘low-hanging-fruit’’ mutations’ (mainly affecting  $\beta$ ) are reached by the population, increasing  $F$  (between  $t_0$  and  $t_1$ , note that  $f_2$  simultaneously decreases). Second, a slow-paced regime in which an increase in  $F$  is only possible through rarer mutations (mainly affecting  $q$ ) (after  $t_1$ , note that  $f_2$  simultaneously increases) and leads to a tradeoff breaking observation similar to the one described in Section 4.

To summarise, this simple set of hypotheses (initial conditions, rarer mutations on  $q$  than on  $\beta$ ) lead to a transient ‘‘fitness-decoupling’’ observation. Interestingly, the tradeoff does not stem from mutational effects (like in the main text), but from the ecological constraint on  $\beta$  that creates a tradeoff between  $F$  and  $f_2$  (purple line in Figure B2a). Tradeoff-breaking is due to rarer mutations on  $q$  (as in the main text where rare mutations increase both survival and growth rate).

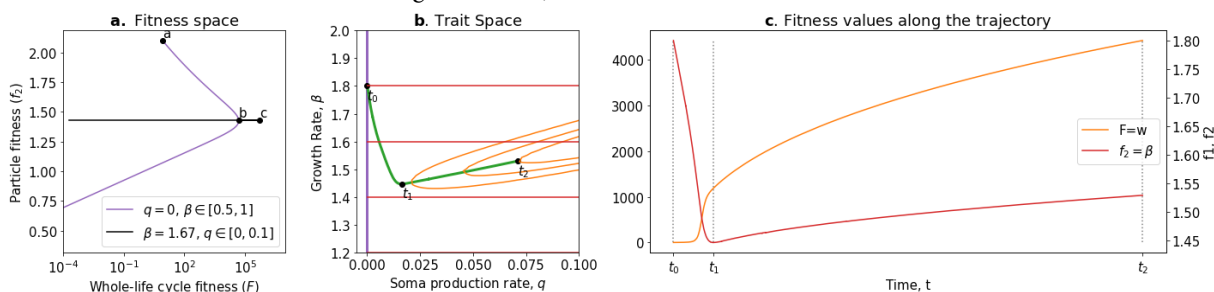

**Figure B2 Tradeoff breaking in the ecological scaffolding scenario** **a.** Values of  $F$  and  $f_2$  accessible to the organism when  $q = 0$  and only  $\beta$  can mutate (purple) and values of  $F$  and  $f_2$  accessible to the organism when only  $q$  can mutate and  $\beta$  is such that  $F$  is maximum for  $q = 0$  (black); **b.** Trait space with isolines of fitness ( $f_2$  in red,  $F$  in orange), with an example of evolutionary trajectory in green (ancestral tradeoff represented in purple). **c.**  $f_2$  and  $F$  values along the example evolutionary trajectory. The times marked by vertical lines in **c.** correspond to the dots in **b.** Note that  $F$  and  $f_2$  have opposed dynamics from  $t_0$  to  $t_1$  (fitness decoupling observation), and both increase from  $t_1$  to  $t_2$ . Rare mutations on  $q$  allow to break-away from the ancestral tradeoff line (tradeoff-breaking observation). Parameters:  $N = 1e + 06, T=30, d=0, \rho = 0.01, \sigma_\beta = 0.1, \sigma_q = 0.001$ .



### Box 3. Ratcheting and Tradeoff-Breaking

Tradeoff-breaking mutations are equivalent to rare mutations that change the set of accessible phenotypes. Libby et al (2016) propose a mechanism of ratcheting mutations that stabilise multicellularity by constraining evolutionary reversion toward unicellularity. They consider a nascent multicellular organism that switches between a multicellular  $G$  and unicellular state  $I$ , growing in an environment alternating between two states, one favoring the multicellular life cycle ( $E_G$ ) the other favoring unicellular life cycle ( $E_I$ ). Two types of ratcheting can occur: first mutations that improve the fitness within the multicellular type that come at a cost to the free-living type (reducing the fitness of revertants) and a second type of ratcheting mutation that decrease the probability that a mutation results in reversion. In the following, we show how the slowest of type 1 or type 2 ratcheting fits as a tradeoff breaking mechanism, as presented in the main text.

The population dynamics of both types  $G_t$  and  $I_t$  in an environment that fluctuates between  $E_G$  and  $E_I$  after a fixed number of generations in each ( $n_g$  and  $n_i$  respectively) is given by Equation 2.3 from Libby et al. (2016):

$$\begin{aligned} \begin{pmatrix} G_{t+n_g+n_i} \\ I_{t+n_g+n_i} \end{pmatrix} &= \begin{pmatrix} (1-c_i)(1-p) + 1 & p \\ (1-c_i)p & 1 + (1-p) \end{pmatrix}^{n_i} \begin{pmatrix} 1 + (1-p) & (1-c_g)p \\ p & (1-c_g)(1-p) + 1 \end{pmatrix}^{n_g} \begin{pmatrix} G_t \\ I_t \end{pmatrix} \\ &= \mathbf{A}_I^{n_i} \mathbf{A}_G^{n_g} \begin{pmatrix} G_t \\ I_t \end{pmatrix} = \mathbf{A} \begin{pmatrix} G_t \\ I_t \end{pmatrix} \end{aligned}$$

Where  $p$  is the probability for cells to switch from one type to the other, and  $c_g, c_i > 0$  are the fitness differences between  $G$  and  $I$  cells in  $E_G$  and  $E_I$  environmental states, respectively. In the following, we fix  $c_g = 0.1$  and the traits that can mutate are  $p$  and  $\Delta c = c_g - c_i$ .

The whole lifecycle fitness of the organism  $F$  is the log of the the dominant eigenvalue of the matrix  $\mathbf{A}$ , the counterfactual fitness  $f_2$  is the fitness of the organisms if they would always be in the  $E_I$  environment ( $n_g = 0$ ), that is the log of the dominant eigenvalue of  $\mathbf{A}_I$ , conversely, the within-collective fitness  $f_1$  is the fitness of the cells if they would constantly be in the  $E_G$  environment, thus the log of the dominant eigenvalue of  $\mathbf{A}_G$ .

Let  $\theta = (\Delta c, p)$  be the trait vector, and let us model evolution using the equation from Section 4 Eq 3, considering that mutations on  $p$  (ratcheting type 2) are more frequent than mutations on  $\Delta c$  (ratcheting type 1):  $\sigma_{\Delta c} = 10^{-4}$ ,  $\sigma_p = 0.2$ . Initial traits values are  $\Delta c = 0$  and  $p = 10^{-5}$  (no fitness gap and very rare switch).

Figure B3b and B3c shows the result of the simulation. The evolutionary trajectory can be splitted in three phases, first, a fast-paced phase where the switch probability increases to 0.2, corresponding to optimisation on the tradeoff (before  $t_1$ ), then a slow increase in  $\Delta c$  corresponding to the slow accumulation of tradeoff breaking mutations (type 1 ratcheting) leading to a tradeoff-breaking observation (between  $t_1$  and  $t_2$ ), and finally a new decrease in switch probability (type 2 ratcheting) corresponding to an optimization on the (new)

tradeoff (after  $t_2$ ). The result is an overall increase in the proportion of G-type in the population (Figure B3c). Note that  $F$  always increases along the trajectory. However,  $f_2$  decreases in the first phase and increases in the second and third phase, showing trajectories that the fitness decoupling model cannot easily account for.

To summarise, this simple set of hypotheses (ratcheting type 1 and 2, with mutations for ratcheting 1 being rarer) lead to a “fitness decoupling” observation when selection first acts along the switch probability tradeoff (leading to higher switching, and an increase in multicellular types) because the optimal trait values for  $F$  and  $f_2$  are different. Then, rarer type 2 ratcheting mutations result in tradeoff-breaking eventually resulting in a second (relatively fast-paced) optimisation on the switch-probability tradeoff (leading to reduced switching, and entrenchment of the multicellular type), which does not result in a “fitness-decoupling” observation because the optimal trait value for  $F$  and  $f_2$  coincide. Note that here, the tradeoff stems from the ratcheting mechanism and the environment periodically switching between multicellularity or unicell-favoring, and not the genetic architecture as in the main text, or population structure as in Box 2.

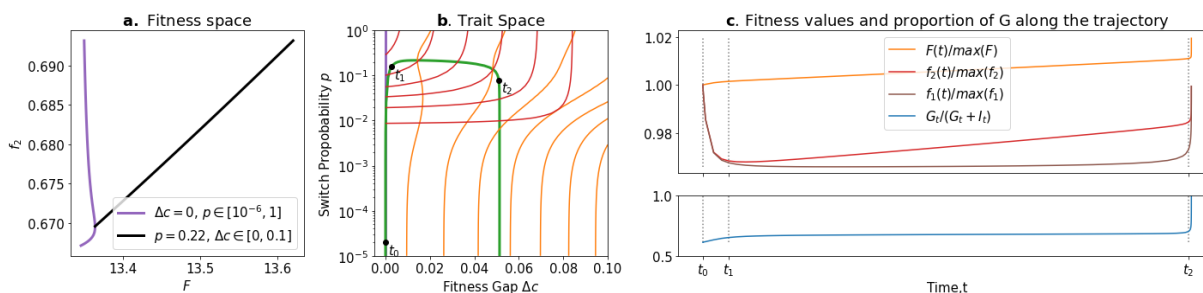

**Figure B3: Ratcheting and Tradeoff-breaking.** *a.* Values of  $F$  and  $f_2$  accessible to organisms when  $\Delta c = 0$  and  $p$  is free (purple), and when  $p=0.2$  and  $\Delta c$  is free (black). *b.* Trait space with isolines of fitness ( $f_2$  in red,  $F$  in orange) with an example of evolutionary trajectory in green (ancestral tradeoff represented in purple); *c.* Fitness values for  $f_1$  (in brown),  $f_2$  and  $F$  as well as the stable proportion of G (in blue) along the example evolutionary trajectory. The times marked by vertical lines in *c.* correspond to the dots in *b.* Note that  $F$  and  $f_2$  have opposed dynamics from  $t_0$  to  $t_1$  (fitness decoupling observation), and both increase after  $t_1$ . Rare mutations on  $\Delta c$  allow to break-away from the ancestral tradeoff line (tradeoff-breaking observation) after  $t_1$ . Parameters:  $c_g = 0.1$ ,  $\sigma_{\Delta c} = 10^{-4}$ ,  $\sigma_p = 0.2$ .

## Glossary.

-*Particles* or *cells*: the lower-level entities of a two-level biological system.

-*Collectives* or *multicells*: the higher-level entities of a two-level biological system.

-*Evolutionary Transition in Individuality* (ETI): Evolutionary process during which collective-level entities become evolutionary individuals and are able to take part in the process of evolution by natural selection ‘in their own right’.

-*Fitness*: The expected average exponential growth rate of a given type of individual (i.e. individual sharing the same traits) in a given steady-state reference environment.

-“*Fitness-decoupling*” *observation*: The observation that the fitness of particles decreases while the fitness of collectives increases. Used in the literature as a probable hallmark of ETI.

-*Within-collective particle fitness*: The fitness of a particle within the collective environment ignoring collective-level events (for instance because they happen at a longer time scale). Noted  $f_1$  in the main text.

- *Counterfactual particle fitness*: The fitness of a hypothetical particle with the same traits that would live in a non-collective reference environment. A relatively recent development of the *fitness decoupling* literature (Hanschen 2015, Shelton 2020). There is no unique way to define the counterfactual reference environment. Noted  $f_2$  in the main text.

- *Whole-lifecycle particle fitness*: The fitness of a particle computed over a reference environment that includes the whole lifecycle of collectives (including collective birth-death events). Mathematically equal to the collective-level fitness if the collective stage distribution reaches a steady state (i.e. collectives do not keep getting bigger or smaller) as proven in Section 2. Noted  $f_3$  in the manuscript.

- *Export-of-fitness model*: A model used to explain “*fitness-decoupling*” *observations* by a “transfer of fitness” from the particle level to the collective level during ETIs.

- *Tradeoff model*: An alternative model to the *Export-of-fitness model* used to explain “*fitness-decoupling*” *observations* by invoking ecological or genetic constraints on the values of traits that contribute to *counterfactual* and *whole-lifecycle fitness* during an ETI.

- *Tradeoff-breaking observation*: The observation that some lineages do not seem to conform to the *fitness decoupling observation* during an ETI: they show an increase of both counterfactual or within-collective fitness and collective fitness.

- *Tradeoff-breaking model*: A model in which the evolutionary trajectories first follow constraints that come from the unicellular ancestors (tradeoff), and that include rare mutations that are not submitted to the same constraints (tradeoff breaking). This model can account for both “*fitness-decoupling*” and “*tradeoff-breaking*” observations during ETIs.

## References

- Abrams, M. (2012). Measured, Modeled, and Causal Conceptions of Fitness. *Frontiers in Genetics*, 3, 196.
- Amdam, G. V., & Page, R. E. (2010). The developmental genetics and physiology of honeybee societies. *Animal Behaviour*, 79(5), 973–980. <https://doi.org/10.1016/j.anbehav.2010.02.007>

- Ariew, A., & Lewontin, R. C. (2004). The Confusions of Fitness. *The British Journal for the Philosophy of Science*, 55(2), 347–363.
- Berman-Frank, I., Lundgren, P., & Falkowski, P. (2003). Nitrogen fixation and photosynthetic oxygen evolution in cyanobacteria. *Research in Microbiology*, 154(3), 157–164.  
[https://doi.org/10.1016/S0923-2508\(03\)00029-9](https://doi.org/10.1016/S0923-2508(03)00029-9)
- Bienvenu, F., & Doucier, G. (2021). *Matpopmod—Matrix Population Models in Python* (0.1) [Computer software]. <https://bienvenu.gitlab.io/matpopmod/>
- Black, A. J., Bourrat, P., & Rainey, P. B. (2020). Ecological scaffolding and the evolution of individuality. *Nature Ecology & Evolution*, 4, 426–436. <https://doi.org/10.1038/s41559-019-1086-9>
- Bouchard, F., & Huneman, P. (2013). *From Groups to Individuals: Evolution and Emerging Individuality*. MIT Press.
- Bourke, A. F. (2011). *Principles of social evolution*. Oxford University Press.
- Bourrat, P. (2015a). Levels of selection are artefacts of different fitness temporal measures. *Ratio*, 28(1), 40–50.
- Bourrat, P. (2015b). Levels, time and fitness in evolutionary transitions in individuality. *Philosophy & Theory in Biology*, 7. <http://dx.doi.org/10.3998/ptb.6959004.0007.001>
- Bourrat, P. (in press). Facts, Conventions, and the Levels of Selection. *Elements in the Philosophy of Biology*.  
<https://www.cambridge.org/core/elements/facts-conventions-and-the-levels-of-selection/8EAF88974A3BE92761217A2EC6AB4634>
- Buss, L. W. (1987). *The Evolution of Individuality*. Princeton University Press.
- Calcott, B., & Sterelny, K. (2011). *The major transitions in evolution revisited*. MIT Press.
- Caswell, H. (1989). *Matrix Population Models*. Sinauer Associates.
- Colón-López, M. S., Sherman, D. M., & Sherman, L. A. (1997). Transcriptional and translational regulation of nitrogenase in light-dark- and continuous-light-grown cultures of the unicellular cyanobacterium

- Cyanothece sp. Strain ATCC 51142. *Journal of Bacteriology*, 179(13), 4319–4327.  
<https://doi.org/10.1128/jb.179.13.4319-4327.1997>
- Conlin, P. L., Kahn, P. C., Beck, T. von, Borin, J. M., Marquez-Zacarias, P., Bozdog, G. O., Kerr, B., & Ratcliff, W. C. (2019, June 26). *Origin and consequences of fitness decoupling during the evolutionary transition to multicellularity*. 2019 Astrobiology Science Conference.  
<https://agu.confex.com/agu/abscicon19/meetingapp.cgi/Paper/482349>
- Davison, D. R., & Michod, R. E. (2021). Phenotypic Plasticity and Evolutionary Transitions in Individuality. In *Phenotypic Plasticity & Evolution*. CRC Press.
- de Vos, M. G. J., Dawid, A., Sunderlikova, V., & Tans, S. J. (2015). Breaking evolutionary constraint with a tradeoff ratchet. *Proceedings of the National Academy of Sciences*, 112(48), 14906–14911.  
<https://doi.org/10.1073/pnas.1510282112>
- Doebeli, M., Ispolatov, Y., & Simon, B. (2017). Towards a mechanistic foundation of evolutionary theory. *ELife*, 6, e23804. <https://doi.org/10.7554/eLife.23804>
- Doulcier, G., Lambert, A., De Monte, S., & Rainey, P. B. (2020). Eco-evolutionary dynamics of nested Darwinian populations and the emergence of community-level heredity. *ELife*, 9, e53433.  
<https://doi.org/10.7554/eLife.53433>
- Doulcier, G., Takacs, P., & Bourrat, P. (2021). Taming fitness: Organism-environment interdependencies preclude long-term fitness forecasting. *BioEssays*, 43(1), 2000157.  
<https://doi.org/10.1002/bies.202000157>
- Fisher, R. A. (1930). *The genetical theory of natural selection*. Oxford University Press.
- Folse, H. J., & Roughgarden, J. (2010). What is an individual organism? A multilevel selection perspective. *The Quarterly Review of Biology*, 85, 447–472.
- Galis, F., & Metz, J. A. J. (2007). Evolutionary novelties: The making and breaking of pleiotropic constraints.

- Integrative and Comparative Biology*, 47(3), 409–419. <https://doi.org/10.1093/icb/icm081>
- Hammerschmidt, K., Landan, G., Domingues Kümmel Tria, F., Alcorta, J., & Dagan, T. (2021). The order of trait emergence in the evolution of cyanobacterial multicellularity. *Genome Biology and Evolution*, 13(2), evaa249. <https://doi.org/10.1093/gbe/evaa249>
- Hammerschmidt, K., Rose, C. J., Kerr, B., & Rainey, P. B. (2014). Life cycles, fitness decoupling and the evolution of multicellularity. *Nature*, 515(7525), 75–79.
- Hanschen, E. R., Davison, D. R., Grochau-Wright, Z. I., & Michod, R. E. (2017). Evolution of Individuality: A Case Study in the Volvocine Green Algae. *Philosophy, Theory, and Practice in Biology*, 9(20171201). <https://doi.org/10.3998/ptb.6959004.0009.003>
- Hanschen, E. R., Shelton, D. E., & Michod, R. E. (2015a). Evolutionary Transitions in Individuality and Recent Models of Multicellularity. In I. Ruiz-Trillo & A. M. Nedelcu (Eds.), *Evolutionary Transitions to Multicellular Life* (Vol. 2, pp. 165–188). Springer Netherlands. [https://doi.org/10.1007/978-94-017-9642-2\\_9](https://doi.org/10.1007/978-94-017-9642-2_9)
- Hanschen, E. R., Shelton, D. E., & Michod, R. E. (2015b). Evolutionary Transitions in Individuality and Recent Models of Multicellularity. In I. Ruiz-Trillo & A. M. Nedelcu (Eds.), *Evolutionary Transitions to Multicellular Life* (Vol. 2, pp. 165–188). Springer Netherlands. [https://doi.org/10.1007/978-94-017-9642-2\\_9](https://doi.org/10.1007/978-94-017-9642-2_9)
- Herron, M. D., Borin, J. M., Boswell, J. C., Walker, J., Chen, I.-C. K., Knox, C. A., Boyd, M., Rosenzweig, F., & Ratcliff, W. C. (2019). De novo origins of multicellularity in response to predation. *Scientific Reports*, 9(1), 2328. <https://doi.org/10.1038/s41598-019-39558-8>
- Jablonka, E. (1994). Inheritance systems and the evolution of new levels of individuality. *Journal of Theoretical Biology*, 170, 301–309.
- Lenski, R. E., Rose, M. R., Simpson, S. C., & Tadler, S. C. (1991). Long-Term Experimental Evolution in

- Escherichia coli. I. Adaptation and Divergence During 2,000 Generations. *The American Naturalist*, 138(6), 1315–1341.
- Libby, E., Conlin, P. L., Kerr, B., & Ratcliff, W. C. (2016). Stabilizing multicellularity through ratcheting. *Philosophical Transactions of the Royal Society B: Biological Sciences*, 371(1701), 20150444.  
<https://doi.org/10.1098/rstb.2015.0444>
- Libby, E., & Ratcliff, W. C. (2014). Ratcheting the evolution of multicellularity. *Science*, 346(6208), 426–427.  
<https://doi.org/10.1126/science.1262053>
- Maynard Smith, J., & Szathmáry, E. (1995). *The Major Transitions in Evolution*. W.H. Freeman.
- Merlo, L. M. F., Pepper, J. W., Reid, B. J., & Maley, C. C. (2006). Cancer as an evolutionary and ecological process. *Nature Reviews Cancer*, 6(12), 924–935. <https://doi.org/10.1038/nrc2013>
- Metz, J. A. J., Nisbet, R. M., & Geritz, S. A. H. (1992). How should we define ‘fitness’ for general ecological scenarios? *Trends in Ecology & Evolution*, 7(6), 198–202.  
[https://doi.org/10.1016/0169-5347\(92\)90073-K](https://doi.org/10.1016/0169-5347(92)90073-K)
- Michod, R. E. (1999). *Darwinian dynamics*. Princeton University Press.
- Michod, R. E. (2005). On the transfer of fitness from the cell to the multicellular organism. *Biology and Philosophy*, 20(5), 967–987.
- Michod, R. E., Nedelcu, A. M., & Roze, D. (2003). Cooperation and conflict in the evolution of individuality: IV. Conflict mediation and evolvability in *Volvox carteri*. *BioSystems*, 69(2–3), 95–114.
- Michod, R. E., & Roze, D. (1999). *Cooperation and Conflict in the Evolution of Individuality. III. Transitions in the Unit of Fitness*. 45.
- Misra, H. S., & Tuli, R. (2000). Differential expression of photosynthesis and nitrogen fixation genes in the cyanobacterium *Plectonema boryanum*. *Plant Physiology*, 122(3), 731–736.  
<https://doi.org/10.1104/pp.122.3.731>

- Mohr, W., Vagner, T., Kuypers, M. M. M., Ackermann, M., & LaRoche, J. (2013). Resolution of conflicting signals at the single-cell level in the regulation of cyanobacterial photosynthesis and nitrogen fixation. *PLoS ONE*, *8*(6), e66060. <https://doi.org/10.1371/journal.pone.0066060>
- Okasha, S. (2006). *Evolution and the levels of selection* (Vol. 16). Clarendon Press.
- Okasha, S. (2009). Individuals, groups, fitness and utility: Multi-level selection meets social choice theory. *Biology & Philosophy*, *24*(5), 561–584. <https://doi.org/10.1007/s10539-009-9154-1>
- Pence, C. H., & Ramsey, G. (2013). A New Foundation for the Propensity Interpretation of Fitness. *The British Journal for the Philosophy of Science*, *64*(4), 851–881. <https://doi.org/10.1093/bjps/axs037>
- Pichugin, Y. (2015). *Theoretical investigation into the origins of multicellularity: A thesis presented in partial fulfilment of the requirements for the degree of PhD in Theoretical Biology at Massey University, Albany, New Zealand* [Thesis, Massey University]. <https://mro.massey.ac.nz/handle/10179/11074>
- Popa, R., Weber, P. K., Pett-Ridge, J., Finzi, J. A., Fallon, S. J., Hutcheon, I. D., Neelson, K. H., & Capone, D. G. (2007). Carbon and nitrogen fixation and metabolite exchange in and between individual cells of *Anabaena oscillarioides*. *The ISME Journal*, *1*(4), 354–360. <https://doi.org/10.1038/ismej.2007.44>
- Rainey, P. B., & Kerr, B. (2010). Cheats as first propagules: A new hypothesis for the evolution of individuality during the transition from single cells to multicellularity. *BioEssays*, *32*(10), 872–880. <https://doi.org/10.1002/bies.201000039>
- Ratcliff, W. C., Denison, R. F., Borrello, M., & Travisano, M. (2012). Experimental evolution of multicellularity. *Proceedings of the National Academy of Sciences*, *109*(5), 1595–1600. <https://doi.org/10.1073/pnas.1115323109>
- Rose, C. J., Hammerschmidt, K., Pichugin, Y., & Rainey, P. B. (2018). *Meta-population structure and the evolutionary transition to multicellularity* [Data set]. <https://doi.org/10.1101/407163>
- Rose, C. J., Hammerschmidt, K., Pichugin, Y., & Rainey, P. B. (2020). Meta-population structure and the



- evolutionary transition to multicellularity. *Ecology Letters*, 23(9), 1380–1390.  
<https://doi.org/10.1111/ele.13570>
- Shelton, D. E., & Michod, R. E. (2010). Philosophical foundations for the hierarchy of life. *Biology & Philosophy*, 25(3), 391–403. <https://doi.org/10.1007/s10539-009-9160-3>
- Shelton, D. E., & Michod, R. E. (2014). Group Selection and Group Adaptation During a Major Evolutionary Transition: Insights from the Evolution of Multicellularity in the Volvocine Algae. *Biological Theory*, 9(4), 452–469.
- Shelton, D. E., & Michod, R. E. (2020). Group and individual selection during evolutionary transitions in individuality: Meanings and partitions. *Philosophical Transactions of the Royal Society B: Biological Sciences*, 375(1797), 20190364. <https://doi.org/10.1098/rstb.2019.0364>
- van Gestel, J., & Tarnita, C. E. (2017). On the origin of biological construction, with a focus on multicellularity. *Proceedings of the National Academy of Sciences*, 201704631. <https://doi.org/10.1073/pnas.1704631114>
- Werren, J. H. (2011). Selfish genetic elements, genetic conflict, and evolutionary innovation. *Proceedings of the National Academy of Sciences*, 108(Supplement 2), 10863–10870.  
<https://doi.org/10.1073/pnas.1102343108>
- West, S. A., Fisher, R. M., Gardner, A., & Kiers, E. T. (2015). Major evolutionary transitions in individuality. *Proceedings of the National Academy of Sciences of the United States of America*, 112(33), 10112–10119.
- Wiser, M. J., & Lenski, R. E. (2015). A Comparison of Methods to Measure Fitness in Escherichia coli. *PLOS ONE*, 10(5), e0126210. <https://doi.org/10.1371/journal.pone.0126210>
- Wiser, M. J., Ribeck, N., & Lenski, R. E. (2013). Long-Term Dynamics of Adaptation in Asexual Populations. *Science*, 342(6164), 1364–1367. <https://doi.org/10.1126/science.1243357>
